# Supplementary material for: Lumbar disc extrusions reduce faster than bulging discs due to an active role of macrophages in sciatica
Source: Springer Nature journal article supplement (doi:10.1007/s00701-019-04117-7), 2019-12-04

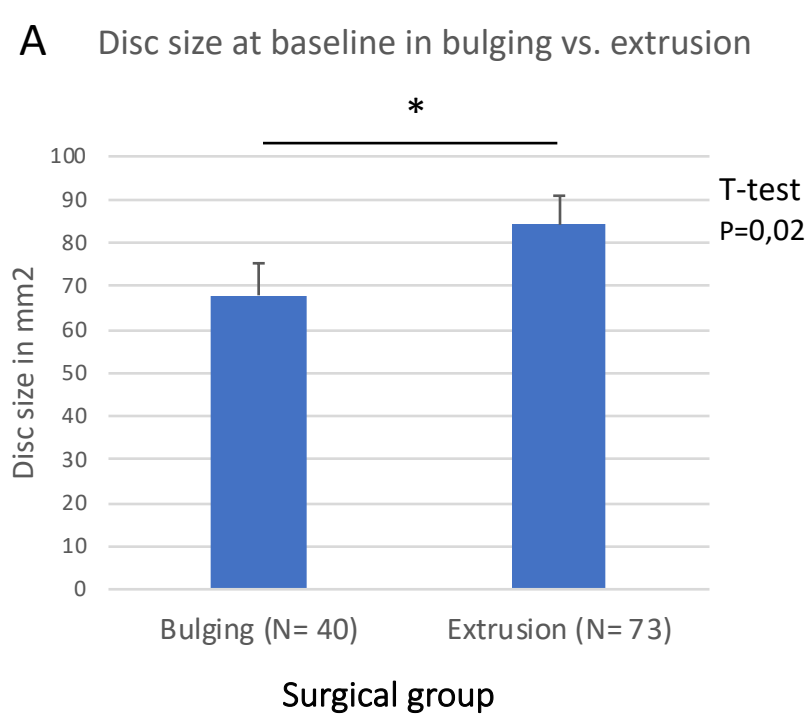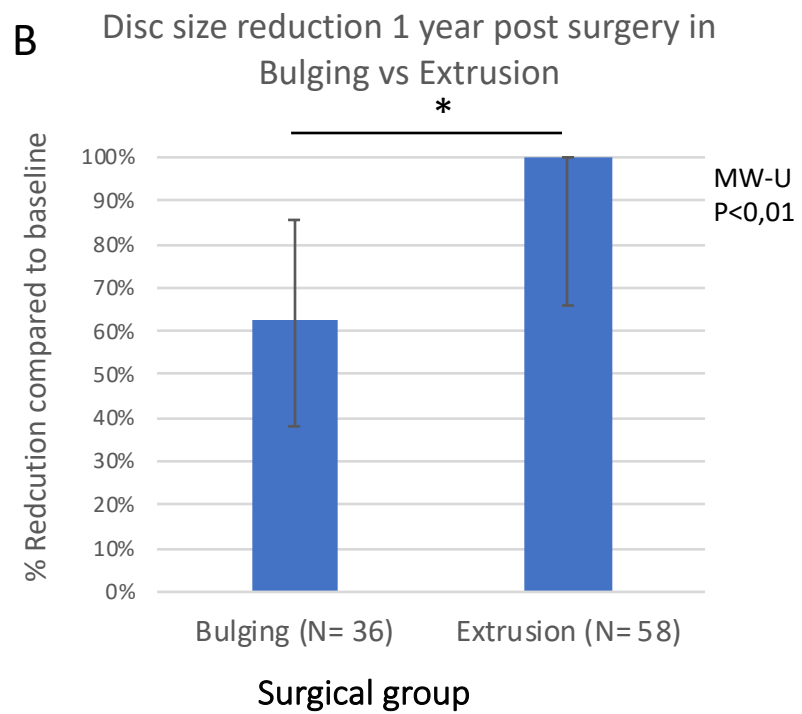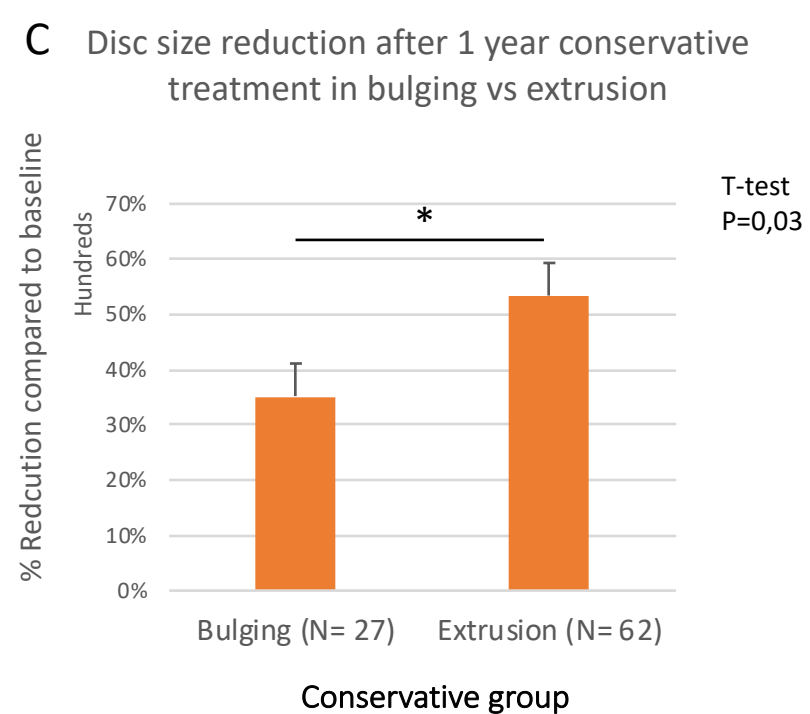

Supplement: MOESM2 [file 17468668]
